# Supplementary material for: Immunologic Profiling of Mutational and Transcriptional Subgroups in Pediatric and Adult High-Grade Gliomas
Source: Oxford University Press journal article supplement (doi:10.1158/2326-6066.cir-18-0939), 2019-07-02
Supplement: 23266066cir180939-sup-214587_2_supp_5504133_pr48wh.xlsx [file 23266066cir180939-sup-214587_2_supp_5504133_pr48wh.xlsx]

## Sheet: CELL_POPULATIONS
HUGO_SYMBOL

## Sheet: FUNC_SIGN_DOUCETTE
HUGO_SYMBOL

## Sheet: FUNC_SIGN_THORSSON
HUGO_SYMBOL
